1  
2  
3  
4  
5  
6  
7  
8  
9  
10  
11  
12  
13  
14  
15  
16  
17  
18  
19  
20  
21  
22  
23  
24  
25  
26  
27  
28  
29  
30  
31  
32  
33  
34  
35

## TimeTeller: a New Tool for Precision Circadian Medicine and Cancer Prognosis

Denise Vlachou<sup>1†</sup>, Georg A. Bjarnason<sup>2</sup>, Sylvie Giacchetti<sup>3,4</sup>, Francis Lévi<sup>1,3,5</sup> & David A. Rand<sup>1,3\*</sup>

### Affiliations:

<sup>1</sup>Mathematics Institute & Zeeman Institute for Systems Biology and Infectious Epidemiology Research, University of Warwick, Coventry CV4 7AL, UK.

<sup>2</sup>Odette Cancer Centre, Sunnybrook Health Sciences Centre, 2075 Bayview Ave., Room T2-049 Toronto, ON, M4N 3M5, Canada.

<sup>3</sup>European Associated Laboratory “Personalizing Cancer Chronotherapy through Systems Medicine”, Institut National de la Santé et de la Recherche Médicale, UMRS 935, Campus CNRS, 7 rue Guy Moquet, 9480- Villejuif, France

<sup>4</sup>Assistance Publique-Hopitaux de Paris, Saint-Louis Hospital, Breast Disease Unit, University Paris Diderot, 75475 Paris, France.

<sup>5</sup>Warwick Medical School, University of Warwick, Coventry CV4 7AL, UK

\*Correspondence to: D.A.Rand@warwick.ac.uk.

†Current address for DV: GSK, Gunnels Wood Road, Stevenage, Hertfordshire, SG1 2NY, UK.

**Acknowledgements:** We thank Ida Iurisci (INSERM U776, Villejuif) for help with complementary information regarding the breast cancer database and Meritxell Saez (University of Warwick) for a critical reading. DAR and DV thank the Engineering & Physical Sciences Research Council (EPSRC) for a PhD studentship through the MOAC Doctoral Training Centre grant number EP/F500378/1. DAR was also supported by Biotechnology and Biological Sciences Research Council (BBSRC) Grant BB/K003097/1 and EPSRC Grant EP/P019811/1. FL & DAR were supported by a grant from Cancer Research UK and EPSRC (C53561/A19933). GAB was supported by The Anna-Liisa Farquharson Chair in Renal Cell Cancer Research.

**Author Contribution Statement:** FL and DAR conceived the project and supervised it. DV developed the algorithm and analysed the data under the guidance of DAR. DV wrote the initial draft under the supervision of DAR and FL. DAR carried out further analysis and wrote the manuscript with assistance from DV, FL & SG. SG provided all data connected with the REMAGUS 2 trial and provided advice on breast cancer. GB provided the dataset used for parameterising the human version of TimeTeller. All authors contributed to and approved the manuscript.

36

### **Abstract**

37           Recent studies have established that the circadian clock influences onset, progression and  
38 therapeutic outcomes in a number of diseases including heart disease and cancer. There are, however, no  
39 tools to monitor the functional state of the circadian clock and its downstream targets in humans. We  
40 provide such a tool and demonstrate its clinical relevance by an application to breast cancer where we  
41 find a strong link between overall survival and our measure of clock dysfunction. We use a machine-  
42 learning approach and construct an algorithm called TimeTeller which uses the multi-dimensional state of  
43 the genes in a transcriptomics analysis of a single biological sample to assess the level of circadian clock  
44 dysfunction. We demonstrate how this can distinguish differences between healthy and diseased tissue  
45 and demonstrate that the clock dysfunction metric is a potentially new prognostic and predictive breast  
46 cancer biomarker that is independent of the main established prognostic factors.

## 47 **Introduction**

48 The cell-endogenous circadian clock regulates tissue-specific gene expression in cells that drives  
49 rhythmic daily variation in metabolic, endocrine, and behavioural functions. Indeed, around half of all  
50 mammalian genes are expressed with a 24-hour rhythm (1, 2). Moreover, recent studies demonstrated that  
51 the circadian clock influences therapeutic outcomes in a number of diseases including heart disease and  
52 cancer (3-9), and that disruption of the normal circadian rhythm and sleep (e.g. through shift work) is  
53 associated with higher risk of obesity, hypertension, diabetes, CHD, stroke and cancer (10-13).

54 A principal aim of circadian medicine (14, 15) is to develop techniques and methods to integrate  
55 the relevance of biological time into clinical practice. However, although circadian disruption is known to  
56 affect multiple organs, it is difficult to monitor the functional state of the circadian clock and its  
57 downstream targets in humans. Consequently, there is a critical need for tools to do this that are practical  
58 in a clinical context. Our focus is on the development of such a technique, and here we will illustrate its  
59 utility to predict breast cancer survival. We present a machine-learning approach to measuring circadian  
60 clock functionality from the expression levels of 10-15 key genes in a single tissue sample. Our algorithm  
61 is applied to breast cancer where previous studies have highlighted the relevance of circadian clocks for  
62 carcinogenesis and treatment effects (16-19) but where no simple method would currently allow its  
63 measurement in daily oncology practice. We find a strong link between overall survival and our measure  
64 of clock dysfunction.

65 There are now several algorithms which aim to estimate the time at which a transcriptomic dataset  
66 was collected using the expression levels of the core clock genes (14, 20-25). While these have hinted at  
67 the idea of using such a time-telling approach to measure circadian clock functionality (23) they are not  
68 purposely constructed to do this, but rather to predict internal timing of functional host circadian systems  
69 (Note S6). Moreover, for practical use, it is highly desirable to be able to do this using just a single  
70 clinical sample, and these algorithms do not attempt this. We therefore developed a new algorithm called  
71 TimeTeller to estimate clock functionality from a single sample.

72 While in the cells of most healthy tissues the cell cycle is gated or phase-locked by the circadian  
73 clock (26, 27), cancer cells often escape this control and display altered molecular clocks (28-30).  
74 Dysregulation of clock genes promotes tumorigenesis (22) through mechanisms involving the cell cycle  
75 (31, 32), DNA damage (33), and metabolism (34). Moreover, the circadian clock rhythmically controls  
76 many molecular pathways which are responsible for large time-of-day dependent changes in drug toxicity  
77 and efficacy (3, 4, 35). It is therefore of interest to determine whether the functionality of the clock in  
78 tumour tissue is a prognostic factor for treatment response and survival.

79 We demonstrate that TimeTeller can characterise differences in the distribution of the dysfunction  
80 metric between healthy and diseased tissue and between different disease strata, and that the dysfunction  
81 metric can be used as a prognostic factor to identify differences in outcome. In particular, we show that in

82 a large cohort of patients with non-metastatic breast cancer the resulting TimeTeller dysfunction metric is  
83 a prognostic factor for survival and provide evidence that it is independent of other known factors. In this  
84 cohort, 82% of the patients with good clock function (i.e. for which the dysfunction metric is below a  
85 natural threshold) survive past ten years while only 62% of the others survive as long.

86 Our approach directly assesses the systemic functionality of a key regulatory system, the circadian  
87 clock, from one sample. A key aspect is that we directly assess the multi-dimensional state of the clock  
88 genes and study the coordinated behaviour of all the genes together rather than focus on each gene  
89 separately. In this way, we can measure the functionality of the clock system as a whole much more  
90 effectively.

## 91 **Results**

92 The mouse and human versions of TimeTeller are trained on two different datasets. The mouse  
93 dataset, from Zhang *et al.* ((1), Note S1) consists of the transcriptomes of 12 mouse tissues measured  
94 every 2 hours over 48 hours while the human training data set from Bjarnason *et al.* ((36), Note S1)  
95 comes from punch biopsies of oral mucosa taken every four hours over 24 hours from five females and  
96 five males. This human dataset was chosen because a key initial aim was to develop TimeTeller in order  
97 to analyse clock function in the tumour biopsies from the REMAGUS trial (37) and our analysis  
98 suggested that it was important to match the microarray technologies (Fig. S2) which in this case was  
99 Affymetrix U133 2.0. The procedure for using these datasets to successfully produce TimeTeller's  
100 probability model is explained in the Materials and Methods section.

101 Rhythmicity and synchronicity analysis was used to determine the panel of genes for TimeTeller  
102 (Materials and Methods, SI Fig. S1, Table S2). This analysis is essential to ensure the choice of a panel of  
103 genes with good circadian rhythmicity combined with minimal variation across tissues and datasets. It  
104 typically produces a panel of between 10 and 16 gene probes and, for the human dataset, the genes  
105 selected were all core clock genes or key clock-controlled genes, including ARNTL (BMAL1), NPAS2,  
106 PER1, PER2, PER3, NR1D1, NR1D2 (REV-ERB $\alpha$ ), CIART (CHRONO), TEF and DBP.

107 TimeTeller works on the combined expression level of these genes and calculates a likelihood  
108 curve  $L_X(t)$  which for healthy tissue should express the probability that the expression profile  $X$  was  
109 measured at time  $t$ . If this time is not known, then it is natural to estimate it as the time  $T$  at which  $L_X(t)$  is  
110 maximal i.e. at the maximum likelihood estimate (MLE) (Materials and Methods). Then we can  
111 characterise precision using ideas from statistics and information theory to obtain a quantity, which we  
112 denote by  $\Theta$ , that characterises the imprecision of the estimate  $T$  (Materials and Methods). We call  $\Theta$  the  
113 *clock dysfunction metric* based on the hypothesis that precise timekeeping implies good functionality.

114 We have tested this clock dysfunction metric using both simulated and real data. Simulated data  
115 were obtained by developing a stochastic version of a relatively detailed published model of the

116 mammalian circadian clock (38) and stochastically simulating this (Note S5). This data was used to  
 117 design the algorithm and to test the effectiveness of TimeTeller, for example, to determine the advantage  
 118 of local approaches over a global one (Fig. S3, Tables S4 & S5), and to analyse TimeTeller's  
 119 effectiveness in detecting the efficiency of partial knockdowns of various efficiencies of the central clock  
 120 gene BMAL1 (ARNTL). We found (Fig S7) that the efficiency of the knockdown was effectively  
 121 recapitulated by an increase in  $\Theta$ . We then applied TimeTeller to a number of mouse and human datasets.

122 ***In healthy tissue TimeTeller accurately assesses time and identifies variation in chronotype.***

123 To assess the accuracy of TimeTeller in estimating the time  $T$  of a sample and to evaluate the  
 124 likelihood curves  $L_X(t)$ , we firstly tested it on the training datasets using a leave-one-out approach. For the  
 125 Zhang *et al.* mouse data, we removed the tissues one at a time, constructed the probability model for  
 126 TimeTeller using the expression profiles from the other tissues and then used TimeTeller to estimate the  
 127 times of the transcriptomes for the removed tissue. For the human Bjarnason *et al.* data we carried out a  
 128 similar leave-one-out approach but where an individual rather than a tissue was left out.

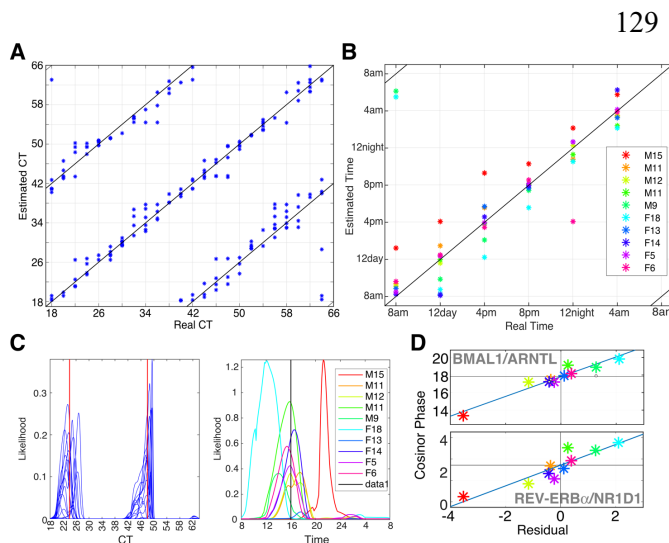

129 **Figure 1. Time estimation.** (A,B) Correlation plots for actual versus predicted time for (A) the Zhang *et al.* data ((1), Note S1) using 11 probes and 8 organs and (B) the human oral mucosa data ((39), Note S1) using a leave-one-out approach. The 5 male (M) and 5 female (F) subjects are identified with a different colour. (C,D) The likelihood functions  $L_X(t)$  obtained for the samples from a representative time for the mouse (left) and human (right) datasets. The vertical lines mark the time of the sample and there is a likelihood curve for each sample. The maximum point of the likelihood

147 functions is used to estimate the time when the sample was taken. (D). For each individual in the  
 148 Bjarnason *et al.* data the residual (estimated time - real time) is plotted against the phase of the gene as  
 149 measured by COSINOR. As explained in the text this shows that a substantial part of the error is  
 150 actually due to variations in the individual sample's chronotype rather than misestimation by  
 151 TimeTeller. See Fig. S5 for similar plots for all genes in the TimeTeller panel.

152 The results are shown in Fig. 1 and the accuracy of the estimations is apparent (Fig. 1A,B). For the  
 153 Bjarnason *et al.* human data the mean absolute error is 1.32h (Table S3) but analysis shows that much of  
 154 this comes from chronotype variation. For example, Male15 and Female18 in Fig. 1B have consistent, yet  
 155 opposite, phase shifts in their estimated times. To further understand this, we plotted the error in the  
 156 TimeTeller estimate against the phase of each of the genes in the TimeTeller panel (Fig. 1D & Fig. S5),  
 157 using COSINOR (40) to measure gene phase. The part of this error at a given time not due to chronotype

158 variation is indicated by the distance of the plotted points from the line  $y = x + p_g$  where  $p_g$  is the  
 159 expected phase of the gene at that time, shown by the horizontal black line. We see that the points are  
 160 typically very close to  $y = x + p_g$  and that the disposition of the points is similar across genes (Fig. 1D &  
 161 Fig. S5). We are therefore able to identify coherent phase variation in the clock genes for each individual.

162 For the mice, no coherent phase shift was found for any of the tissues as would be expected from  
 163 their genetic homogeneity and the mixing of material from multiple mice. Moreover, in this case the use  
 164 of the full 48-hour space allows us to observe that TimeTeller's transcriptomic time signature at CT $t$  is  
 165 essentially the same as at CT( $t+24$ ). This means that there is no significant change to the circadian clock  
 166 gene shape after the mice have been in the dark for an extra 24 hours.

### 167 **Healthy tissue clocks in mice are characterised by a clear upper threshold.**

168 The range of  $\Theta$  values resulting from applying TimeTeller to the mouse training dataset using a  
 169 leave-one-out approach as above are shown in the histogram in Fig. 2A. The upper bound to this range  
 170 helps us to define what  $\Theta$  values represent a functioning circadian clock. The majority of the data has  $\Theta <$   
 171 0.1, but the distribution has a tail up to approximately  $\Theta = 0.2$ . We therefore define good clock function  
 172 (GCF) for mouse samples as those having  $\Theta < \Theta_{\text{GCF}} = 0.2$ . We refer to thresholds chosen in this way as *a*  
 173 *priori* as they have the advantage of being chosen naturally without the potential issues associated with  
 174 tuning and optimisation, for example to maximise statistical significance.

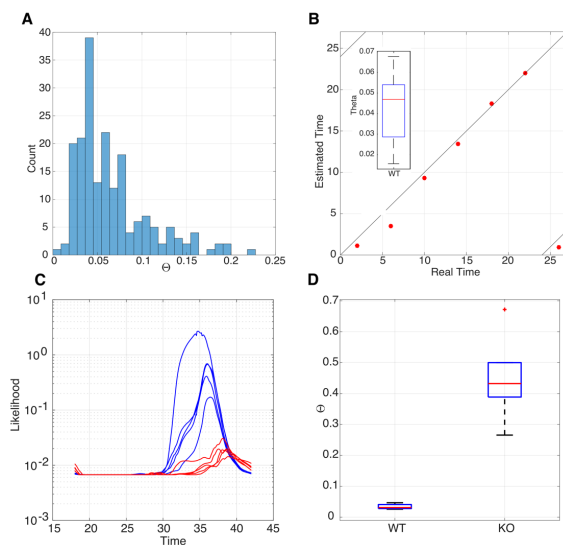

**Figure 2. A. Histogram showing the distribution of  $\Theta$  values for the Zhang *et al.* data.** For all 182 samples of the Zhang data, the distribution of  $\Theta$  values has a median around 0.05, a tail that extends to approximately 0.2 and two outliers. **B. Scatter plot showing the real time versus estimated time for the LeMartelot *et al.* liver timecourse data together with the observed range of  $\Theta$  values (inset).** **C. Likelihood functions for the MLE time  $T$  of samples of the Fang *et al.* data.** They have been plotted on a logarithmic scale to reveal structure in the very low KO curves. Blue curves represent WT samples with clear peaks around CT32-36, and the negligible amplitude curves in red

192 for the KO data. **D. Box plot of  $\Theta$  values for WT and KO data.** There is a very significant difference  
 193 between the groups. Wilcoxon's logrank test  $p < 10^{-6}$ .

194 We compared the above results with the estimation of time  $T$  and the  $\Theta$  values in another published  
 195 mouse dataset, Le Martelot *et al.* ((41), Note S1.2), which uses the same microarrays and obtained very  
 196 good agreement (Fig. 2B). The mean absolute error for time estimation is less than one hour. The  $\Theta$   
 197 values range between 0.02 and 0.11 with one value at  $\Theta = 0.17$  (Fig. 2B). Thus, all values fall within the  
 198 GCF criterion  $\Theta < \Theta_{\text{GCF}}$  defined in the previous section.

199 ***TimeTeller can identify perturbed but functioning clocks.***

200 The gene REV-ERB $\alpha$  is regarded as the main controller of the ZT18-24 phase of the mammalian  
201 circadian clock (42) and, interestingly, activation of clock REV-ERB $\alpha$  can be a therapeutic approach for  
202 several types of cancer (43) and life-threatening cholangitis (44). Thus, knocking REV-ERB $\alpha$  out leaves a  
203 functional but perturbed clock when compared to wild-type mice (42). Therefore, we applied TimeTeller  
204 to an experimental dataset Fang *et al.* (42) comparing liver samples of REV-ERB $\alpha$  deficient and wild type  
205 mice entrained to LD12:12 cycles. Since REV-ERB $\alpha$  is one of the panel of genes used in TimeTeller it  
206 would not be surprising that TimeTeller could distinguish REV-ERB $\alpha$  deficient mice from WT mice, and  
207 indeed this is the case. Therefore, for this validation, we use a version of TimeTeller that excludes REV-  
208 ERB $\alpha$  from its panel of genes. This modified TimeTeller clearly detects that the REV-ERB $\alpha$  deficient  
209 mice have a functional but significantly perturbed clock when compared to wild-type mice (Fig. 2D).  
210 Although the WT (blue) likelihoods are wide and irregularly shaped, they produce relatively accurate and  
211 consistent estimations of ZT around 36h, with corresponding  $\Theta$ s between 0.03 and 0.13 and a mean  
212 absolute error of around 2 hours for time estimations of the WT data. This slightly raised estimation error,  
213 but good  $\Theta$  values, could be explained by the discrepancy arising from the use of mice in constant  
214 darkness to train TimeTeller to estimate the time of mice that have been in regular LD cycles. The (red)  
215 KO likelihoods appear almost entirely flat if not plotted on a logarithmic scale (Fig. 2C).

216 ***Healthy and diseased human tissue have different  $\Theta$  distributions.***

217 Using a leave-one-out approach as above, TimeTeller was used to find the  $\Theta$  values for the training  
218 data, using all ten healthy individuals from Bjarnason *et al.* This defines the  $\Theta$  distribution for healthy  
219 functioning human clocks and is shown in Fig. 3(A,B). For most human samples in the training set,  $\Theta <$   
220 0.09, with a maximum value at  $\Theta = 0.155$ . The  $\Theta$  values were relatively uniform across individuals (Fig.  
221 S9). This maximum value provides an *a priori* upper threshold  $\Theta_{\text{GCF}}$  for a “functioning clock” range. When  
222 applying TimeTeller to independent human datasets we define a tissue sample to have good clock  
223 function (GCF) if  $\Theta < \Theta_{\text{GCF}} = 0.155$ .

224 In Fig. 3(A) we also show the  $\Theta$  distributions for two other healthy datasets which served as  
225 controls in the indicated studies, thus emphasizing the similarities in  $\Theta$  distribution from three  
226 independent healthy oral mucosa datasets. The control  $\Theta$  distributions can then be compared with two  
227 cancer datasets that used the same microarray technology, including oral squamous cell carcinoma (41)  
228 and breast carcinomas. Similarly, in Fig. 3(B) we compare the histogram of  $\Theta$  values from the training  
229 data with that from the patients in the REMAGUS trial. We observe that, although around half of the  
230 REMAGUS data has  $\Theta$  values in the same range as the healthy Bjarnason *et al.* data, the distributions for  
231 the cancer data are significantly biased towards larger values of  $\Theta$ .

232

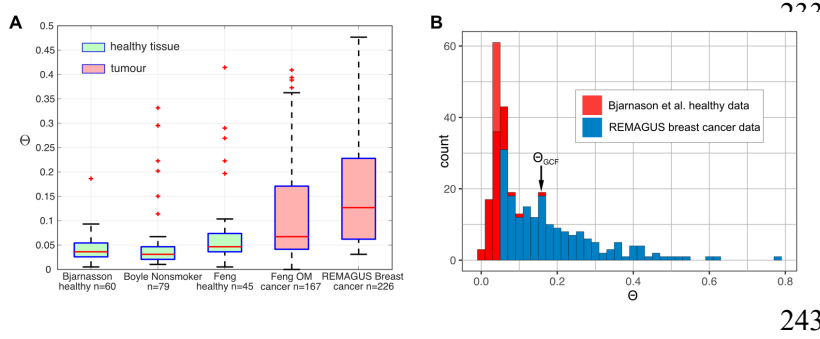

**Figure 3.** (A) Box plots of  $\Theta$  distribution for healthy and cancerous tissue. As indicated they are from Bjarnasson *et al.* (Note S1), Boyle *et al.* ((39), Note S1.3), Feng *et al.* ((45), Note S1.3), and the REMAGUS trial (Note S1.3). (B) Histogram showing the distribution of  $\Theta$  values for healthy oral mucosa training data (red) and breast

243

244 cancer samples (blue). The  $\Theta$  distribution of the 60 healthy oral mucosa samples and the 226  
 245 REMAGUS tumour samples distributions are shown. Histograms are stacked.

246 More specifically, Feng *et al.* (45) conducted a comparative analysis of healthy oral mucosa  
 247 transcriptome and oral squamous cell carcinoma transcriptome (Fig. 3A). The resulting MLEs are plotted  
 248 against the  $\Theta$  values in Fig. S15. The normal and dysplastic samples show realistic estimated timings  
 249 (9am-3pm) while the cancerous samples show some unrealistic estimations during the night, but with  
 250 more than half of them having  $\Theta > 0.1$ . The  $\Theta$  distribution for the cancerous samples and the combined  
 251 normal and dysplastic samples are clearly different (Wilcoxon Rank Sum test  $p = 0.0003$ ) with the cancer  
 252 data being significantly biased towards larger values of  $\Theta$  (Fig S15).

### 253 ***GCF is associated with a significant survival advantage for breast cancer.***

254 Our main application of TimeTeller concerns the REMAGUS multicenter randomised phase II clinical  
 255 trial which aimed to assess the response of primary breast cancer to different protocols of neoadjuvant  
 256 chemotherapy according to tumour hormonal receptor status and HER2 expression (37, 46-48). Of the  
 257 trial's 340 patients, 226 had a pretreatment cancer biopsy using the same RNA extraction procedure and  
 258 analysed with Affymetrix U133A microarrays. There is 10-year survival data for all but two of these.  
 259 TimeTeller was used to estimate the time and calculate the clock dysfunction metric  $\Theta$  for all 224 tumour  
 260 transcriptome samples.

261 To consider whether  $\Theta$  was indicative of survival we used the threshold  $\Theta_{GCF}$  above and the  
 262 definition of Good Clock Function (GCF) and asked whether the survival of those with GCF was  
 263 different from those without it. A Kaplan-Meier survival analysis (Fig. 4A,B) showed clear statistically  
 264 significant separation of survival curves with the analysis showing that while 82% of patients with GCF  
 265 survived for ten years or more, only 61% of the other patients survived as long ( $p = 0.026$ ) (Fig. 4A).  
 266 These results did not depend on this precise choice of threshold but we underline that  $\Theta_{GCF}$  is chosen *a*  
 267 *priori* using the healthy data and is not chosen by optimising the p-value.



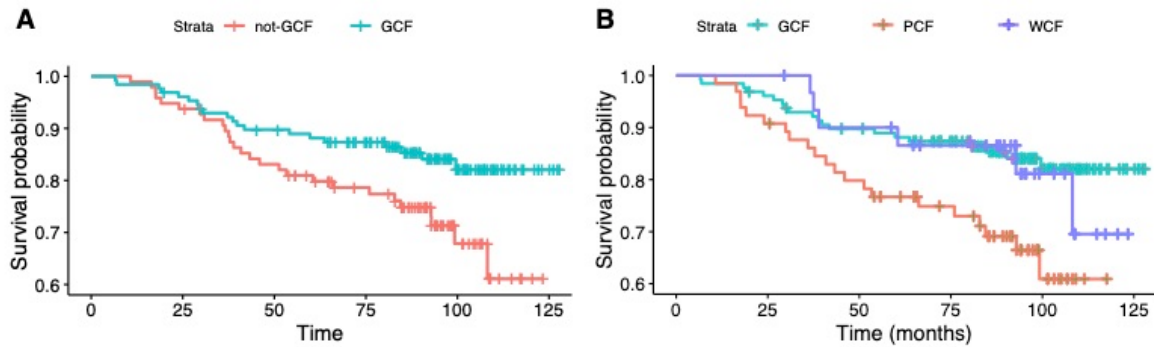

268  
269 Figure 4. (A) Kaplan-Meier survival plot showing differences in survival for patients with or without GCF (log  
270 rank test  $p=0.022$ ). (B) Kaplan-Meier survival plot showing differences in survival for patients with GCF, those  
271 with poor clock function (PCF) or worst clock function (WCF) (log rank test  $p=0.018$ ). The blue curve suggests  
272 that individuals with WCF have increased survival until 7-8 years after treatment. If the WCF individuals are  
273 considered separately (see text), the difference between the overall survival of the GCF and the PCF groups is  
274 highly statistically significant (log-rank  $p=0.0058$ ).

275 In examining the relation between  $\Theta$  and survival outcomes we noticed that, if the group without  
276 GCF was further subdivided into those with the worst clock function (WCF) (i.e.  $\Theta > \Theta_{\text{WCF}} = 0.3$ ) and the  
277 rest (defined as poor clock function, PCF), we observed an even stronger highly significant survival  
278 advantage of GCF over PCF (log rank test  $p = 0.0058$ ). The threshold  $\Theta_{\text{WCF}}$  for WCF approximately  
279 optimised this p-value but the p-value remains well below 0.02 for all choices of the threshold between  
280 0.25 and 0.325. We discuss the WCF group below.

### 281 ***Dysfunction $\Theta$ differs significantly between comparable prognostic factor strata.***

282 In the light of these observations, we studied the  $\Theta$  distributions and hazard ratios for GCF against  
283 PCF for each main established prognostic factor stratum. For breast cancer these factors are related to  
284 receptors expression above established threshold for estrogen receptors (ER+/ER-); progesterone  
285 receptors (PR+/ PR-); and human epidermal growth factor protein receptors (HER2+/HER2-). Prognostic  
286 factors also include triple negative (TN) (i.e. ER-, PR-, and HER2-); histologic differentiation grade  
287 (well, 1; intermediate, 2 or poor, 3); tumour staging according to size (largest diameter of  $<5$  cm, T1-T2,  
288 or  $\geq 5$  cm, T3-T4); nodal status (pN0/pN1-3); and lympho-vascular invasion (LVI, yes/no).

289 For almost all of the above prognostic factors we find statistically significant differences between  
290 the respective strata (Fig. 5). High clock dysfunction  $\Theta$  values characterised breast tumours that were  
291 large (T3-4, diameter  $> 5$  cm) rather than small (T1-2) (bilateral t-test,  $p = 0.014$ ), or were poorly rather  
292 than well or moderately well differentiated (Grade 3 vs. 1-2,  $p = 0.026$ ). Moreover, the clock dysfunction  
293 metric had higher values in the breast cancers that did not express estrogen receptors ( $p = 0.006$ ), and/or  
294 progesterone receptors ( $p = 0.007$ ), or were triple negative ( $p= 0.0005$ ), as well as in those where  
295 neoadjuvant chemotherapy did not achieve pathologic Complete Response (pCR).

296

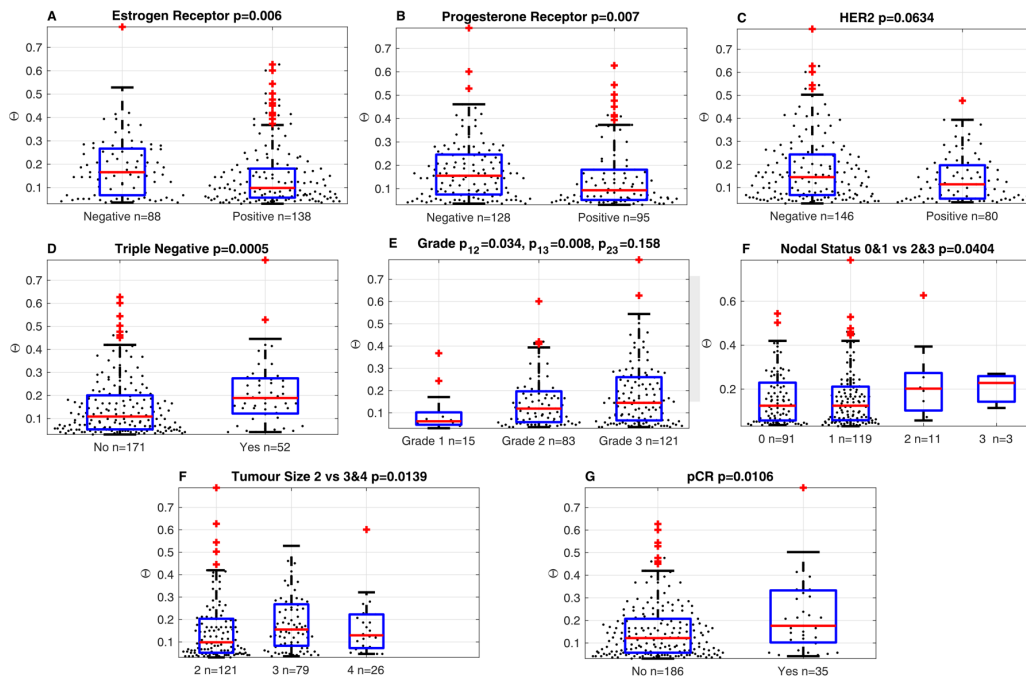

298 **Figure 5. Boxplots showing distributions of  $\Theta$  values for the main prognostic strata:** Estrogen  
 299 receptors, Progesterone receptors, HER2 receptors, Triple Negative status, Grade, Nodal Status,  
 300 Tumour size, and the reach of a pathologic Complete Response (pCR) after the administration of neo-  
 301 adjuvant chemotherapy.

302 ***Within many strata the calculated hazard ratio reveals a strong survival advantage for GCF***

303 We calculated hazard ratios (HRs) of an earlier death for the GCF vs. PCF patients for each factor  
 304 using the Cox proportional hazards model (49) and performed both univariate (Fig. 6A,B) and  
 305 multivariate (Fig. 6C,D,E) analyses. In the univariate analysis we observe a statistically significant  
 306 survival advantage in terms of the HR for the whole population and for each of the following strata:  
 307 limited tumour size (T1-T2), a well differentiated tumour (Grade 1 or 2), no lymphovascular invasion  
 308 (LVI-), ER+, PR-, HER2-, and not displaying high susceptibility to chemotherapy (pCR-) (Fig. 6B, Fig.  
 309 S12).

310 In the multivariate analysis for the whole population and those strata identified by the univariate  
 311 analysis, the mean HR for both GCF vs. nonGCF and GCF vs. PCF remained well below one implying a  
 312 strong survival advantage for GCF. For example, in the group of 96 patients with grade 1 or 2 tumours,  
 313 there is a very advantageous mean HR of 0.24 for GCF vs. PCF with a p-value of 0.021. This means that,  
 314 holding the other covariates constant, compared to those with PCF there is a 76% reduction in the hazard  
 315 rate for GCF. We see (Fig. 6D) that for this group GCF is largely independent of the other factors and has  
 316 the strongest effect, even stronger than tumour size (a small tumour gives a 60% reduction compared to a  
 317 large one and other factors have a much smaller effect). Given the modest numbers involved, this is a  
 318 striking result underlining the strength of GCF and a similar result is found for the even smaller group of

319 tumours that are grade 1 or 2 and HER2 negative. Although, statistical significance at the  $p < 0.05$  level  
 320 was only found in these strata, a power analysis suggested that all of those identified by the univariate  
 321 analysis might become significant if the patient group is increased to a few times the current size (Fig.  
 322 6F). Taken together, all the analyses suggest that the circadian clock function of tumours, measured by  
 323 our metric  $\Theta$ , adds further independent information and represents itself a potentially useful prognostic  
 324 and predictive biomarker. The results for GCF vs. notGCF are similar (Fig. S12. & S13).  
 325

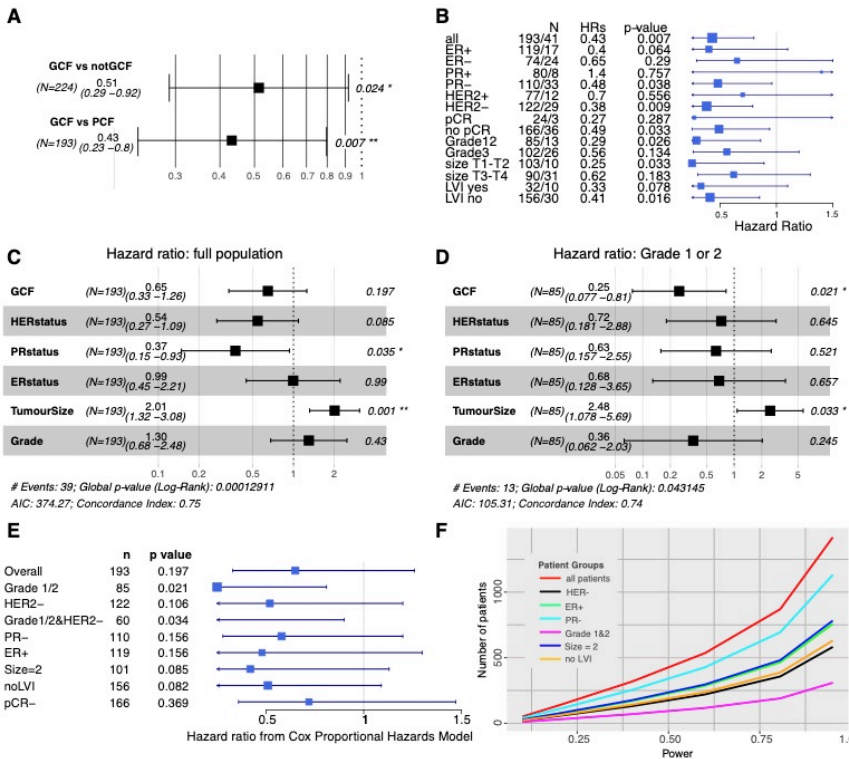

Figure 6. (A-E) Analysis of overall survival using the Cox Proportional Hazards Model to calculate hazard ratios (HRs) for GCF vs. PCF. Horizontal bars in figures indicate 95% confidence limits and the squares mark the estimated means. (A,B) Univariate analysis for all considered prognostic factors. (C,D) Multivariate analysis of overall survival using the Cox model for (C) all samples, and (D) those with grade 1 or 2 tumours. The global p-value evaluates the omnibus null hypothesis that all of the HRs are 1. The p-values associated with each factor concern the HR for that factor where one compares the hazard for GCF against the hazard for the alternative, conditional on the other prognostic factors being the

351 same. (E) HR values for multivariate analysis of GCF vs. PCF in all prognostic strata showing significance in  
 352 the univariate analysis. (F) Power analysis for the various patient groups showing the number of patients  
 353 needed to achieve a given power for the Cox model. This uses the R package ssizeEpiCont which provides a  
 354 sample size calculation for Cox proportional hazards regression with nonbinary covariates.

### 355 Does WCF lead to heightened susceptibility to chemotherapy?

356 A Kaplan-Meier survival analysis of GCF vs. PCF vs. WCF (Fig. 4B) shows that the WCF group  
 357 appear to have a survival advantage up to about 7 or 8 years, but this is not statistically significant with  
 358 the small group size involved. Given this and the fact that it has previously been observed that severe  
 359 circadian clock disruption, as caused by Cry1/Cry 2 double knock out, improved the efficacy of  
 360 chemotherapy (50), we asked whether large values of the dysfunction metric might serve as a predictor  
 361 for tumor sensitivity to chemotherapy. While the mean clock dysfunction metric showed an increase with  
 362 grade and stage, we observed higher average  $\Theta$  values ( $p = 0.0106$ ; Fig. 5G) for tumours that best  
 363 responded to neoadjuvant chemotherapy as indicated by reaching pathological complete response (pCR)

364 which is defined as absence of residual invasive cancer cells in the breast and axillary lymph nodes (grade  
365 1 and 2 of Chevallier's classification). Moreover, the rate of pCR was 35% among the WCF patients, as  
366 compared to 12% and 13.8% respectively for those cases with GCF and PCF ( $p < 0.015$ ). In view of these  
367 observations, we hypothesise that the initial prolonged survival in the WCF subset is due to their  
368 heightened susceptibility to chemotherapy.

## 369 **Discussion**

370 Our study had two aims. Firstly, to provide a way of assessing from a single biological sample how  
371 well the circadian clock is working, and secondly, to highlight its relevance for circadian medicine  
372 through a stringent test. We applied TimeTeller to breast cancer and show that survival and clock  
373 functionality were linked.

### 374 *Assessing clock dysfunction.*

375 TimeTeller produces an estimate  $\Theta$  of clock functionality that is based on the likelihood curve  
376  $L_X(t)$ . The key to why this works so well is the correlation structure in the data points at a given time. The  
377  $G$  clock genes in our training data are far from independent and although they are noisy and subject to  
378 measurement error, they have a clear correlation structure and their covariance matrix has rapidly  
379 decreasing eigenvalues. This means that, considered as a vector, they can have an accuracy in assessing  
380 time  $T$  that is much greater than any single gene. Thus our multi-dimensional approach studying the data  
381 in  $G$ -dimensional space and combining several dimension-reducing projections is crucial.

382 In our discussion here we have restricted attention to the circadian clock but there is no reason in  
383 principle why this approach cannot be applied much more generally. For example, it would be of great  
384 interest to apply it to a coupled system such as that involving the circadian clock and cell cycle or to the  
385 clock and any representative set of rhythmic downstream genes. Indeed, it is worth noting that one of the  
386 genes identified in the mouse model is the gene *Wee1* which provides a key connection between the clock  
387 and cell cycle (51).

388 Further work is needed to try and understand what aspects of the cells and tissues give rise to the  
389 high  $\Theta$  values we observe in diseased tissue. Since our metric  $\Theta$  gives a stratification of clock function in  
390 cells and tissue we have a way of stratifying cells and using this for a more targeted search to uncover the  
391 links between the clock and the mechanisms leading to disease and cellular dysfunction.

### 392 *Breast cancer survival.*

393 We have shown a very clear link between  $\Theta$  and 10-year breast cancer survival in the REMAGUS  
394 trial. Despite the large body of work showing that circadian disruption was associated with poor  
395 prognosis and that chemotherapy timing could make the difference between life or death in preclinical  
396 breast cancer (17-19, 52), there was previously no simple method which would allow its measurement in  
397 daily oncology practice. Our work has the potential to change this as the method we present only requires

398 a single sample and can be adapted to any gene expression technology. We envisage the use of this metric  
399 in conjunction with current prognostic factors to refine treatment management. The results should also  
400 open up new opportunities for research into the circadian clock as a target for treatment using the  
401 stratification by the dysfunction metric. The techniques developed here can potentially be applied to other  
402 diseases involving the circadian clock and other regulatory systems by extending the gene panel outside  
403 of the circadian clock in the way discussed above.

404 About 85% of the patients we have studied have tumour samples that were either in the GCF or  
405 PCF strata and we saw that for these, disruption of the tumour circadian clock as indicated by PCF is  
406 associated with poor survival, suggesting that those patients might benefit from clock-targeted therapies.  
407 On the other hand, our work suggested the hypothesis that those patients with WCF samples had  
408 heightened susceptibility to chemotherapy. This might suggest that the clinical relevance of the tumour  
409 circadian clock function for possible treatment strategies is greatest for those with less aggressive tumours.  
410 This is also supported by the highly advantageous HRs found in the patients with grade 1 or 2 tumours.  
411 However, although tumours that are PR- have a worse prognosis than those that are PR+, it is in the PR-  
412 stratum that in the univariate analysis GCF provided a very advantageous HR of 0.48 as compared to  
413 PCF, whereas there was no apparent advantage to GCF in the PR+ stratum. Overall, we have established  
414 a new model for tissue clock functionality and timing determination that could help refine treatment  
415 strategies for breast cancer. We expect that the clock model will further display broad implications for  
416 circadian medicine at large through enabling the integration of molecular clock determinations in diseased  
417 tissues, and the design of innovative clock-targeted therapies with measurable effects.

## 418 **Materials and Methods**

### 419 *Analysis of rhythmicity and synchronicity*

420 For rhythmicity analysis of the training data we used JTK CYCLE and COSINOR (Fig. S1, Table  
421 S2, Note S3). To measure synchronicity amongst individuals we used an approach using Singular Value  
422 Decomposition (SVD) as explained in Note S2. Genes that performed well for both aspects were selected  
423 for the TimeTeller mouse and human panels (Fig. S1, Table S2). The number of genes in the panel is  
424 denoted by  $G$ .

425 For all the work on mouse data,  $G = 11$  and the genes are ARNTL (Bmal1), NPAS2, Clock,  
426 NR1D1 (REV-ERB $\alpha$ ), NR1D2, PER2, PER3, CIART, DBP, TEF, and WEE1. For the work on human  
427 data the analysis identified  $G = 16$  probes from 10 genes ARNTL, NPAS2, PER1, PER2, PER3, NR1D1,  
428 NR1D2, CIART, TEF, and DBP. These were used for the leave-one-out analyses but only  $G = 15$  of them  
429 were used in analysing the independent human datasets. This was because the Per1 probe 244677\\_\\_at was  
430 found to have significant signal issues in many of the independent datasets, i.e. the signals values were

431 very low. As there is another Per1 probe in this dataset that does not have this problem, we concluded that  
 432 this is a probe issue, and not an issue with the Per1 gene expression.

### 433 **Construction of the likelihood**

434 For each observation  $j = 1, \dots, N$  and each time  $t_i$  where  $i = 1, \dots, T$ , the training data for each set of  $G$   
 435 expression levels is stored in vectors  $\bar{X}_{i,j}$  in  $G$ -dimensional space. The observations  $j$  correspond to  
 436 tissues for the mouse data and individuals for the human data. Each  $\bar{X}_{i,j}$  is then normalised to have a  
 437 mean of 0 and standard deviation of 1, resulting in the vector  $X_{i,j}$ . These are the vectors that will be used  
 438 to parameterise TimeTeller.

439 As each sample is treated individually under both vector normalisation and the initial fRMA  
 440 normalisation, there is no time-course batch bias in the TimeTeller method. As every vector  $X_{i,j}$  is  
 441 independent and the shape information it contains (i.e. the normalised expression levels of the genes) is  
 442 all that TimeTeller has to go on. However, this also means that the same transcriptome quantification  
 443 technology for the training and test samples is crucial as illustrated in Fig. S2.

444 To construct the probability model we firstly construct one for each timepoint by using the local  
 445 statistical structure of the data at that timepoint and then we combine these. Fix a timepoint  $t_i$ . Associated  
 446 with this is the set of  $N$  points  $X_{i,j}$  in  $G$ -dimensional space. The projection operator  $U_{d,\ell}$  described in  
 447 Note S2 gives an optimal way to linearly project these points into  $d$ -dimensional space for all  $d < G$ . This  
 448 produces a corresponding set of  $N$   $d$ -dimensional points  $Q_{i,j}$ . We then fit a multivariate normal  
 449 distribution (MVN) to the points  $Q_{i,j}$ . The dimensionality  $d$  is chosen so that there are enough vectors  
 450  $Q_{i,j}$  to fit a  $d$ -dimensional multivariate Gaussian (using the MATLAB function `fitgmdist`) while ensuring  
 451 that most of the variance in the data is captured by the  $d$ -dimensional projection. In our case we take  $d =$   
 452 3. A MVN distribution is defined by its mean and covariance matrix which we denote by  $\mu_i(t_i)$  and  
 453  $\Sigma_i(t_i)$  respectively.

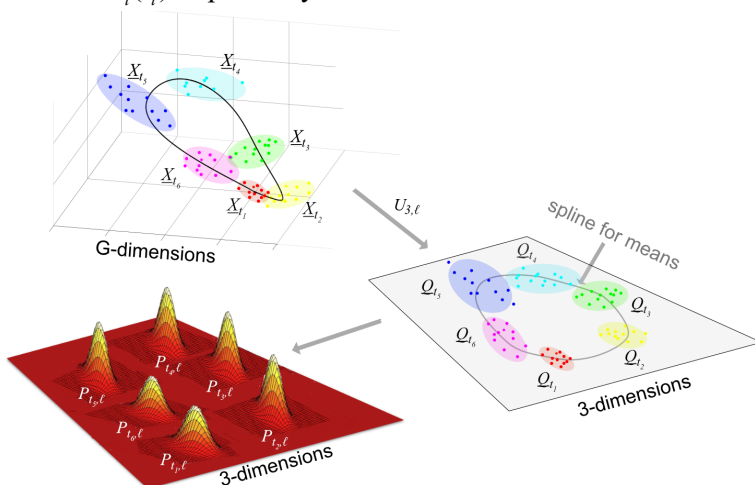

Figure 6. This schematic outlines the construction of the likelihood  $L_X(t)$ . For each  $t_i$ , the set of vectors  $\underline{X}_{t_i} = \{X_{i,j}, j = 1, \dots, N\}$  are projected into  $d=3$  dimensions using  $U_{d,i}$  to get  $\underline{Q}_{t_i} = \{Q_{i,j}, j = 1, \dots, N\}$ . A MVN distribution is estimated for each  $\underline{Q}_{t_i} = \{Q_{i,j}, j = 1, \dots, N\}$  and then these distributions are interpolated using splines to all times  $t$  of the day. See Fig. S4 for the projections  $U_{d,i}$  for the Bjarnason *et al.* data.

464 We fit a shape-preserving smoothing cubic periodic spline through the mean vectors  $\mu_i(t_i)$  and  
465 each of the six entries that determine the  $3 \times 3$  symmetric matrix  $\Sigma_i(t_i)$  so as to extend  $\mu_i(t_i)$  and  $\Sigma_i(t_i)$   
466 to all times  $t$  between the time points  $t_i$  thus obtaining  $\mu_i(t)$  and  $\Sigma_i(t)$ . A piecewise cubic Hermite  
467 interpolating polynomial spline is used in this case. This type of spline is shape preserving, i.e. continuity  
468 of the second derivative is not obligatory. This is suitable as, for example, if two covariance matrix entries  
469 were identical for two consecutive time Gaussians, the Hermite spline allows the value of the joining  
470 spline to stay the same in the space between, while a standard spline would enforce some change. This  
471 spline also interpolates so that it passes through all points. The calculations were carried out using the  
472 MATLAB function *pchip*. Using this approach, for this value of  $i$ , we have determined a family of MVN  
473 distributions for all times  $t$  between the first and last data times.

474 Now we define the likelihood curve  $L_X(t)$  where  $X$  is a  $G$ -dimensional normalised expression  
475 vector using the same genes as the TimeTeller panel. This is given by firstly defining the likelihood  
476  $L_{X,i}(t)$  associated with the  $i$ th timepoint using the probability given by the MVN i.e.

$$477 \quad L_{X,i}(t) = \frac{1}{(2\pi)^{d/2} |\Sigma_i(t)|^{1/2}} \exp\left(-\frac{1}{2}(U_{d,i}X - \mu_{i(t)})^T \Sigma_i(t)^{-1} (U_{d,i}X - \mu_{i(t)})\right)$$

478 and then combining them as follows

$$479 \quad L_X(t) = \left(\prod_{i=1}^T L_{X,i}(t)\right)^{1/T} .$$

480 In Fig. S3 we explain why we use this local approach, using projections calculated locally and then  
481 combining them, rather than using a single projection of all the training data.

### 482 **Construction of the clock dysfunction metric $\Theta$**

483 We characterise precision using ideas from statistics and information theory. If  $T$  is the time at  
484 which  $L_X(t)$  is maximal (Fig. 1C,D), and we wish to consider the hypothesis that the time  $t$  of the sample  
485 is different from  $T$  then the Neyman-Pearson lemma tells us how to proceed. According to it, for a given  
486 significance level (i.e. probability of a false positive), the most powerful test uses the size of the  
487 likelihood ratio  $\Lambda(t) = L_X(t) / L_X(T)$  and is a test of the form  $\Lambda(t) \geq \eta$  where  $\eta$  is chosen so as to obtain a  
488 given false-positive error rate. We choose a value of  $\eta$  and then define the clock dysfunction metric  $\Theta$  to  
489 be the relative fraction of the times  $t$  for which  $\Lambda(t) \geq \eta$  once we have chosen  $\eta$ . If  $\Theta$  is small then  $L_X(t)$   
490 determines the time  $T$  with high certainty and we interpret this as the clock working well, but if it is large  
491 then  $L_X(t)$  does not determine the time well and we interpret this as showing a dysfunctional clock.

492 However, the following considerations lead us to use a slightly more complicated approach. We  
493 explain in Fig. S4 that the likelihood  $L_X(t)$  often has two peaks with another high peak roughly 12 hours  
494 away from the MLE. This is because of the elliptic form of our probability distribution in  $G$ -dimensional

495 space (Fig. S4). In this case we would want the metric to penalise the lesser peak, but if the two peaks are  
496 close then we would not want this penalty because that is compatible with reasonably good clock function  
497 (see Fig. S6). As it stands, the metric would not distinguish between these two cases.

498 In view of this, rather than using a constant threshold  $\eta$  we use one that is a function of time  $t$ ,  
499 namely, we multiply  $\eta$  by  $C(t|T, \epsilon)$  where  $C(t|T, \epsilon) = 1 + \epsilon + \cos(2\pi(t - T) / 24)$ . This is a simple cosine  
500 curve transformed so that  $\epsilon \leq C \leq 2 + \epsilon$ ,  $C(T|T, \epsilon) = \epsilon$  and  $C(T + 12|T, \epsilon) = 2 + \epsilon$ . We define  $\epsilon > 0$  so  
501 that  $C > 0$ . The larger  $\epsilon$  is, the less anti-phase peaks impact the final confidence metric. The values of  $\eta$   
502 and  $\epsilon$  used are explained in the Note S4.

503 The clock dysfunction metric  $\Theta$  is defined to be the proportion of times  $t$  which satisfy

$$504 \quad \Lambda(t) = \frac{L_x(t)}{L_x(T)} \geq \eta C(t|T, \epsilon)$$

505 Some examples of likelihoods and how we would want them to be classified are shown in Fig. S6.

506 Finally, we note that the above definition does not use the value of the likelihood at its maximum.  
507 To ensure that the maximum value achieved is not too small and that exceptionally small values are  
508 discounted, we set a minimum value  $\omega$  for the likelihoods and we reset  $L_x(t)$  to  $L_x(t) = \omega$  whenever  
509  $L_x(t) \leq \omega$ . The parameter  $\omega$  reflects the perceived signal-to-noise ratio. It means that the value of the  
510 likelihood curve at the MLE must be far greater than this limit for it to be significant, i.e.  $L_x(T) \gg \omega$ . A  
511 typical value used for  $\omega$  is  $e^{-5} \approx 0.0067$  and this value was chosen manually, by observation of the log-  
512 likelihood curves.

## 513 References

- 514 1. R. Zhang, N. F. Lahens, H. I. Ballance, M. E. Hughes, J. B. Hogenesch, A circadian gene expression atlas  
515 in mammals: implications for biology and medicine. *Proc Natl Acad Sci U S A* **111**, 16219-16224 (2014).
- 516 2. L. S. Mure *et al.*, Diurnal transcriptome atlas of a primate across major neural and peripheral tissues.  
517 *Science* **359**, eaao0318 (2018).
- 518 3. F. Levi, U. Schibler, Circadian rhythms: mechanisms and therapeutic implications. *Annu. Rev. Pharmacol.*  
519 *Toxicol.* **47**, 593-628 (2007).
- 520 4. F. Levi, A. Okyar, S. Dulong, P. F. Innominato, J. Clairambault, Circadian timing in cancer treatments.  
521 *Annual review of pharmacology and toxicology* **50**, 377-421 (2010).
- 522 5. S. Kobuchi, Y. Yazaki, Y. Ito, T. J. E. J. o. P. S. Sakaeda, Circadian variations in the pharmacokinetics of  
523 capecitabine and its metabolites in rats. *European Journal of Pharmaceutical Sciences* **112**, 152-158  
524 (2018).
- 525 6. T. Squire *et al.*, Does chronomodulated radiotherapy improve pathological response in locally advanced  
526 rectal cancer? *Chronobiology international* **34**, 492-503 (2017).
- 527 7. E. Cordina-Duverger *et al.*, Night shift work and breast cancer: a pooled analysis of population-based case-  
528 control studies with complete work history. *European Journal of Epidemiology*, 1-11 (2018).
- 529 8. Z. Shan *et al.*, Rotating night shift work and adherence to unhealthy lifestyle in predicting risk of type 2  
530 diabetes: results from two large US cohorts of female nurses. *BMJ* **363**, k4641 (2018).
- 531 9. N. M. Kettner *et al.*, Circadian homeostasis of liver metabolism suppresses hepatocarcinogenesis. *Cancer*  
532 *Cell* **30**, 909-924 (2016).
- 533 10. F. Cappuccio, M. A. Miller, S. W. Lockley, *Sleep, health, and society: From aetiology to public health.*  
534 (Oxford University Press, 2010).



- 535 11. F. P. Cappuccio, M. A. Miller, Sleep and cardio-metabolic disease. *Current cardiology reports* **19**, 110  
536 (2017).
- 537 12. D. Leger, V. Bayon, A. de Sanctis, The role of sleep in the regulation of body weight. *Molecular and*  
538 *cellular endocrinology* **418**, 101-107 (2015).
- 539 13. M. Jike, O. Itani, N. Watanabe, D. J. Buysse, Y. Kaneita, Long sleep duration and health outcomes: A  
540 systematic review, meta-analysis and meta-regression. *Sleep Medicine Reviews* **39**, 25-36 (2018).
- 541 14. M. D. Ruben *et al.*, A database of tissue-specific rhythmically expressed human genes has potential  
542 applications in circadian medicine. *Science Translational Medicine* **10**, eaat8806 (2018).
- 543 15. S. Panda, The arrival of circadian medicine. *Nature Reviews Endocrinology* **15**, 67-69 (2019).
- 544 16. C. Cadenas *et al.*, Loss of circadian clock gene expression is associated with tumor progression in breast  
545 cancer. *Cell Cycle (Georgetown, Tex.)* **13**, 3282--3291 (2014).
- 546 17. E. Broadberry *et al.*, Disrupted circadian clocks and altered tissue mechanics in primary human breast  
547 tumours. *Breast Cancer Research* **20**, 125 (2018).
- 548 18. T. Granda *et al.*, Experimental chronotherapy of mouse mammary adenocarcinoma MA13/C with docetaxel  
549 and doxorubicin as single agents and in combination. *Cancer Research* **61**, 1996-2001 (2001).
- 550 19. N. Matsunaga *et al.*, Optimized dosing schedule based on circadian dynamics of mouse breast cancer stem  
551 cells improves the anti-tumor effects of aldehyde dehydrogenase. *Journal of Cancer Research* **78**, 3698-  
552 3708 (2018).
- 553 20. R. C. Anafi, L. J. Francey, J. B. Hogenesch, J. Kim, CYCLOPS reveals human transcriptional rhythms in  
554 health and disease. *Proceedings of the National Academy of Sciences* **114**, 5312--5317 (2017).
- 555 21. J. J. Hughey, T. Hastie, A. J. Butte, ZeitZeiger: supervised learning for high-dimensional data from an  
556 oscillatory system. *Nucleic Acids Res* **44**, e80 (2016).
- 557 22. E. E. Laing *et al.*, Blood transcriptome based biomarkers for human circadian phase. *eLife* **6**, 1--26 (2017).
- 558 23. J. Shilts, G. Chen, J. J. Hughey, Evidence for widespread dysregulation of circadian clock progression in  
559 human cancer. *PeerJ* **6**, e4327 (2018).
- 560 24. H. R. Ueda *et al.*, Molecular-timetable methods for detection of body time and rhythm disorders from  
561 single-time-point genome-wide expression profiles. *Proceedings of the National Academy of Sciences of*  
562 *the United States of America* **101**, 11227--11232 (2004).
- 563 25. N. Wittenbrink *et al.*, High-accuracy determination of internal circadian time from a single blood sample.  
564 *The Journal of Clinical Investigation* **128**, 3826-3839 (2018).
- 565 26. J. Bieler *et al.*, Robust synchronization of coupled circadian and cell cycle oscillators in single mammalian  
566 cells. *Mol Syst Biol* **10**, 739 (2014).
- 567 27. C. Feillet *et al.*, Phase locking and multiple oscillating attractors for the coupled mammalian clock and cell  
568 cycle. *Proceedings of the National Academy of Sciences of the United States of America* **111**, 9828--9833  
569 (2014).
- 570 28. I. Iurisci *et al.*, Improved tumor control through circadian clock induction by Seliciclib, a cyclin-dependent  
571 kinase inhibitor. *Cancer Res* **66**, 10720-10728 (2006).
- 572 29. S. Kiessling *et al.*, Enhancing circadian clock function in cancer cells inhibits tumor growth. *BMC Biology*  
573 **15**, 1--18 (2017).
- 574 30. P. Lin *et al.*, Chronopharmacodynamics and mechanisms of antitumor effect induced by erlotinib in  
575 xenograft-bearing nude mice. *Biochemical and Biophysical Research Communications* **460**, 362-367  
576 (2015).
- 577 31. R. El-Athman *et al.*, The Ink4a/Arf locus operates as a regulator of the circadian clock modulating RAS  
578 activity. *PLoS Biology* **15**, e2002940 (2017).
- 579 32. P. A. Wood, J. Du-Quiton, S. You, W. J. Hrushesky, Circadian clock coordinates cancer cell cycle  
580 progression, thymidylate synthase, and 5-fluorouracil therapeutic index. *Molecular Cancer Therapeutics* **5**,  
581 2023-2033 (2006).
- 582 33. A. Sancar *et al.*, Circadian clock control of the cellular response to DNA damage. *FEBS Letters* **584**, 2618-  
583 2625 (2010).
- 584 34. K. Eckel-Mahan, P. Sassone-Corsi, Metabolism and the circadian clock converge. *Physiological Reviews*  
585 **93**, 107-135 (2013).
- 586 35. R. Dallmann, A. Okyar, F. Lévi, Dosing-time makes the poison: circadian regulation and pharmacotherapy.  
587 *Trends in Molecular Medicine* **22**, 430-445 (2016).

- 588 36. G. Bjarnason *et al.*, Diurnal rhythms (DR) in gene expression in human oral mucosa: Implications for  
589 gender differences in toxicity, response and survival and optimal timing of targeted therapy (Rx). *Journal*  
590 *of Clinical Oncology* **25**, 2507-2507 (2007).
- 591 37. S. Giacchetti *et al.*, Long-term outcome of the REMAGUS 02 trial, a multicenter randomised phase II trial  
592 in locally advanced breast cancer patients treated with neoadjuvant chemotherapy with or without celecoxib  
593 or trastuzumab according to HER2 status. *European Journal of Cancer* **75**, 323--332 (2017).
- 594 38. A. Relogio *et al.*, Tuning the mammalian circadian clock: robust synergy of two loops. *PLoS Comput Biol*  
595 **7**, e1002309 (2011).
- 596 39. J. O. Boyle *et al.*, Effects of cigarette smoke on the human oral mucosal transcriptome. *Cancer Prevention*  
597 *Research* **3**, 266--278 (2010).
- 598 40. G. Cornelissen, Cosinor-based rhythmometry. *Theoretical Biology and Medical Modelling* **11**, 1--24  
599 (2014).
- 600 41. G. Le Martelot *et al.*, Genome-wide RNA polymerase II profiles and RNA accumulation reveal kinetics of  
601 transcription and associated epigenetic changes during diurnal cycles. *PLoS Biology* **10**, e1001442 (2012).
- 602 42. B. Fang *et al.*, Circadian enhancers coordinate multiple phases of rhythmic gene transcription in vivo. *Cell*  
603 **159**, 1140--1152 (2014).
- 604 43. G. Sulli *et al.*, Pharmacological activation of REV-ERBs is lethal in cancer and oncogene-induced  
605 senescence. **553**, 351 (2018).
- 606 44. B. Pourcet *et al.*, Nuclear receptor subfamily 1 group D member 1 regulates circadian activity of NLRP3  
607 inflammasome to reduce the severity of fulminant hepatitis in mice. *Gastroenterology* **154**, 1449-1464.  
608 e1420 (2018).
- 609 45. L. Feng, J. R. Houck, P. Lohavanichbutr, C. Chen, Transcriptome analysis reveals differentially expressed  
610 lncRNAs between oral squamous cell carcinoma and healthy oral mucosa. *Oncotarget* **8**, 31521--31531  
611 (2017).
- 612 46. P. de Cremoux *et al.*, Importance of pre-analytical steps for transcriptome and RT-qPCR analyses in the  
613 context of the phase II randomised multicentre trial REMAGUS02 of neoadjuvant chemotherapy in breast  
614 cancer patients. *BMC Cancer* **11**, 215 (2011).
- 615 47. F. Valet *et al.*, Challenging single- and multi-probesets gene expression signatures of pathological complete  
616 response to neoadjuvant chemotherapy in breast cancer: experience of the REMAGUS 02 phase II trial.  
617 *Breast (Edinburgh, Scotland)* **22**, 1052--1059 (2013).
- 618 48. J.-Y. Pierga *et al.*, A multicenter randomized phase II study of sequential epirubicin/cyclophosphamide  
619 followed by docetaxel with or without celecoxib or trastuzumab according to HER2 status, as primary  
620 chemotherapy for localized invasive breast cancer patients. *Breast Cancer Research and Treatment* **122**,  
621 429-437 (2010).
- 622 49. D. R. Cox, Regression models and life-tables. *Journal of the Royal Statistical Society. Series B*  
623 *(Methodological)* **34**, 187-220 (1972).
- 624 50. J. H. Lee, A. Sancar, Circadian clock disruption improves the efficacy of chemotherapy through p73-  
625 mediated apoptosis. *Proceedings of the National Academy of Sciences* **108**, 10668--10672 (2011).
- 626 51. T. Matsuo *et al.*, Control mechanism of the circadian clock for timing of cell division in vivo. *Science* **302**,  
627 255-259 (2003).
- 628 52. C. Cadenas *et al.*, Loss of circadian clock gene expression is associated with tumor progression in breast  
629 cancer. *Cell Cycle*. **13**, 3282-3291 (2014).
